# Supplementary material for: Associations of FKBP5 Polymorphisms and Methylation and Parenting Style With Depressive Symptoms Among Chinese Adolescents
Source: Research Square preprint supplement (doi:10.21203/rs.3.rs-728266/v1), 2021-08-30
Supplement: Supplementary file 1 [file 2b77e37124e8d1d293f4e0e5.docx]

| **Table S1.** **Genotype frequency distribution of the *FKBP5* polymorphisms between students with and without depressive symptoms** | | | | |
| --- | --- | --- | --- | --- |
| **Variable** | **Depressive symptoms**  **group (n=120)** | | **Non-depressive symptoms**  **group (n=118)** | ***P* value*** |
| rs7748266 | |  |  |  |
| CC | | 75 (63.6) | 65 (56.0) | 0.324 |
| CT | | 34 (28.8) | 36 (31.0) |  |
| TT | | 9 (7.6) | 15 (12.9) |  |
| rs9470080 | |  |  |  |
| CC | | 57 (48.7) | 47 (40.5) | 0.129 |
| CT | | 49 (41.9) | 48 (41.4) |  |
| TT | | 11 (9.4) | 21 (18.1) |  |
| rs4713902 | |  |  |  |
| TT | | 68 (58.6) | 74 (64.3) | 0.645 |
| TC | | 45 (38.8) | 39 (33.9) |  |
| CC | | 3 (2.6) | 2 (1.7) |  |
| rs1360780 | |  |  |  |
| CC | | 68 (58.1) | 59 (52.2) | 0.456 |
| CT | | 39 (33.3) | 39 (34.5) |  |
| TT | | 10 (8.5) | 15 (13.3) |  |
| rs9380524 | |  |  |  |
| CC | | 40 (34.2) | 51 (44.3) | 0.178 |
| CA | | 64 (54.7) | 49 (42.9) |  |
| AA | | 13 (11.1) | 15 (13.0) |  |
| rs9394309 | |  |  |  |
| AA | | 74 (62.7) | 63 (54.3) | 0.392 |
| AG | | 34 (28.8) | 39 (33.6) |  |
| GG | | 10 (8.5) | 14 (12.1) |  |
| rs7757037 | |  |  |  |
| AA | | 41 (36.0) | 38 (33.9) | 0.067 |
| AG | | 58 (50.9) | 46 (41.1) |  |
| GG | | 15 (13.2) | 28 (25.0) |  |
| rs1043805 | |  |  |  |
| AA | | 74 (63.8) | 68 (58.6) | 0.721 |
| AT | | 35 (30.2) | 40 (34.5) |  |
| TT | | 7 (6.0) | 8 (6.9) |  |
| rs2766533 | |  |  |  |
| GG | | 59 (50.0) | 49 (42.2) | 0.141 |
| GA | | 50 (42.4) | 49 (42.2) |  |
| AA | | 9 (7.6) | 18 (15.5) |  |
| rs3800373 | |  |  |  |
| AA | | 67 (57.8) | 56 (49.6) | 0.250 |
| AC | | 39 (33.6) | 40 (35.4) |  |
| CC | | 10 (8.6) | 17 (15.0) |  |
| rs4713916 | |  |  |  |
| AA | | 75 (63.6) | 63 (54.3) | 0.237 |
| AG | | 35 (29.7) | 39 (33.6) |  |
| GG | | 8 (6.8) | 14 (12.1) |  |
| rs9296158 | |  |  |  |
| AA | | 55 (49.5) | 47 (41.2) | 0.227 |
| AG | | 46 (41.4) | 49 (43.0) |  |
| GG | | 10 (9.0) | 18 (15.8) |  |
| rs2817032 | |  |  |  |
| **Table S1. Genotype frequency distribution of the *FKBP5* SNPs** **between students with and without depressive symptoms (continued)** | | | | |
| TT | | 69 (58.5) | 59 (50.9) | 0.057 |
| TC | | 42 (35.6) | 39 (33.6) |  |
| CC | | 7 (5.9) | 18 (15.5) |  |
| rs2817035 | |  |  |  |
| GG | | 72 (61.5) | 60 (52.2) | 0.115 |
| GA | | 37 (31.6) | 38 (33.0) |  |
| AA | | 8 (6.8) | 17 (14.8) |  |

*: The chi-square test was used for categorical variables.

| **Table S2.** **Methylation levels at CpG sites in the promoter region of *FKBP5* between students with and without depressive symptoms** | | | |
| --- | --- | --- | --- |
| **CPG unit** | **Non-depressive symptoms group (n=118)** | **Depressive symptoms group (n=120)** | ***P* value*** |
| *FKBP5*-12 CpG 1 | 0.73 (1.85) | 0.77 (1.46) | 0.861 |
| *FKBP5*-12 CpG 2 | 2.92 (2.40) | 3.06 (2.36) | 0.644 |
| *FKBP5*-12 CpG 3 | 3.13 (3.58) | 2.34 (2.89) | 0.064 |
| *FKBP5*-12 CpG 4 | 2.48 (4.95) | 3.33 (5.59) | 0.217 |
| *FKBP5*-12 CpG 5.6.7 | 40.97 (15.69) | 40.19 (16.59) | 0.713 |
| *FKBP5*-12 CpG 8 | 5.72 (5.81) | 5.64 (10.12) | 0.940 |
| *FKBP5*-12 CpG 9 | 5.46 (5.41) | 4.79 (4.72) | 0.310 |
| *FKBP5*-12 CpG 10.11 | 3.74 (8.96) | 3.87 (9.01) | 0.910 |
| *FKBP5*-12 CpG 12 | 14.67 (14.01) | 12.85 (13.22) | 0.304 |
| *FKBP5*-12 CpG 13 | 53.96 (21.14) | 50.16 (23.14) | 0.187 |
| *FKBP5*-12 CpG 14 | 2.84 (2.42) | 3.37 (2.92) | 0.128 |
| *FKBP5*-12 CpG 15 | 2.63 (3.47) | 2.42 (3.25) | 0.617 |
| *FKBP5*-12 CpG 17.18.19 | 14.15 (9.27) | 14.27 (10.41) | 0.919 |
| *FKBP5*-12 CpG 20 | 2.48 (4.95) | 3.33 (5.59) | 0.217 |

Note: *FKBP5*-12 represents DNA fragment position corresponding to primer #12.

*: Data were presented as Mean ± SD, and student’s t-tests were used to estimate the differences between students with and without depressive symptoms

| **Table S3. Mediation analyses of *FKBP5* promoter methylation on the associations between *FKBP5* polymorphisms and depressive symptoms.** | | | | | |
| --- | --- | --- | --- | --- | --- |
| **SNP** | **Mediating variable** | **Direct effect (95% CI)*** | ***P* value** | **Indirect effect (95% CI)*** | ***P* value** |
| rs7757037 | *FKBP5*-12 CpG 1 | -0.271 (-0.638~0.096) | 0.147 | 0 (-0.030~0.022) | 0.998 |
|  | *FKBP5*-12 CpG 2 | -0.268 (-0.636~0.099) | 0.152 | -0.003 (-0.062~0.017) | 0.837 |
|  | *FKBP5*-12 CpG 3 | -0.322 (-0.696~0.052) | 0.091 | 0.048 (0~0.159) | 0.205 |
|  | *FKBP5*-12 CpG 4 | -0.273 (-0.640~0.095) | 0.146 | 0.001 (-0.042~0.050) | 0.978 |
|  | *FKBP5*-12 CpG 5.6.7 | -0.273 (-0.640~0.095) | 0.146 | 0.001 (-0.026~0.044) | 0.938 |
|  | *FKBP5*-12 CpG 8 | -0.271 (-0.638~0.096) | 0.148 | -0.0004 (-0.024~0.029) | 0.974 |
|  | *FKBP5*-12 CpG 9 | -0.276 (-0.643~0.092) | 0.142 | 0.004 (-0.015~0.068) | 0.817 |
|  | *FKBP5*-12 CpG 10.11 | -0.271 (-0.638~0.096) | 0.148 | -0.001 (-0.084~0.047) | 0.974 |
|  | *FKBP5*-12 CpG 12 | -0.282 (-0.651~0.086) | 0.134 | 0.010 (-0.014~0.089) | 0.626 |
|  | *FKBP5*-12 CpG 13 | -0.269 (-0.637~0.099) | 0.152 | -0.004 (-0.070~0.020) | 0.823 |
|  | *FKBP5*-12 CpG 14 | -0.250 (-0.620~0.120) | 0.186 | -0.025 (-0.013~0.009) | 0.384 |
|  | *FKBP5*-12 CpG 15 | -0.273 (-0.641~0.094) | 0.145 | 0.002 (-0.015~0.039) | 0.895 |
|  | *FKBP5*-12 CpG 17.18.19 | -0.272 (-0.639~0.095) | 0.147 | 0.0001 (-0.022~0.038) | 0.993 |
|  | *FKBP5*-12 CpG 20 | -0.273 (-0.640~0.095) | 0.146 | 0.001 (-0.037~0.044) | 0.978 |
|  |  |  |  |  |  |
| rs2817032 | *FKBP5*-12 CpG 1 | -0.382 (-0.768~0.004) | 0.052 | 0.003 (-0.014~0.063) | 0.849 |
|  | *FKBP5*-12 CpG 2 | -0.378 (-0.770~0.014) | 0.059 | -0.0008 (-0.097~0.067) | 0.983 |
|  | *FKBP5*-12 CpG 3 | -0.432 (-0.825~-0.038) | 0.032 | 0.045 (-0.001~0.169) | 0.224 |
|  | *FKBP5*-12 CpG 4 | -0.359 (-0.747~0.028) | 0.069 | -0.020 (-0.125~0.012) | 0.465 |
|  | *FKBP5*-12 CpG 5.6.7 | -0.375 (-0.762~0.011) | 0.057 | -0.004 (-0.059~0.030) | 0.863 |
|  | *FKBP5*-12 CpG 8 | -0.382 (-0.770~0.005) | 0.053 | 0.004 (-0.066~0.063) | 0.880 |
|  | *FKBP5*-12 CpG 9 | -0.366 (-0.754~0.022) | 0.064 | -0.014 (-0.084~0.016) | 0.563 |
|  | *FKBP5*-12 CpG 10.11 | -0.381 (-0.766~0.005) | 0.053 | 0.002 (-0.068~0.147) | 0.904 |
|  | *FKBP5*-12 CpG 12 | -0.393 (-0.780~-0.005) | 0.047 | 0.012 (-0.010~0.073) | 0.581 |
| **Table S3. Mediation analyses of FKBP5 promoter methylation on the associations between FKBP5 polymorphisms and depressive symptoms (continued).** | | | | | |
|  | *FKBP5*-12 CpG 13 | -0.347 (-0.738~0.045) | 0.083 | -0.035 (-0.131~0.024) | 0.361 |
|  | *FKBP5*-12 CpG 14 | -0.366 (-0.753~0.021) | 0.064 | -0.016 (-0.108~0.017) | 0.525 |
|  | *FKBP5*-12 CpG 15 | -0.376 (-0.763~0.011) | 0.057 | -0.003 (-0.059~0.039) | 0.900 |
|  | *FKBP5*-12 CpG 17.18.19 | -0.386 (-0.777~0.004) | 0.053 | 0.008 (-0.052~0.095) | 0.826 |
|  | *FKBP5*-12 CpG 20 | -0.359 (-0.747~0.028) | 0.069 | -0.020 (-0.132~0.013) | 0.465 |
|  |  |  |  |  |  |
| rs2817035 | *FKBP5*-12 CpG 1 | -0.379 (-0.765~0.006) | 0.054 | 0.001 (-0.019~0.050) | 0.933 |
|  | *FKBP5*-12 CpG 2 | -0.376 (-0.766~0.014) | 0.059 | -0.002 (-0.083~0.054) | 0.949 |
|  | *FKBP5*-12 CpG 3 | -0.451 (-0.849~-0.053) | 0.026 | 0.065 (-0.001~0.222) | 0.141 |
|  | *FKBP5*-12 CpG 4 | -0.356 (-0.745~0.033) | 0.073 | -0.023 (-0.144~0.022) | 0.465 |
|  | *FKBP5*-12 CpG 5.6.7 | -0.384 (-0.771~0.003) | 0.052 | 0.005 (-0.015~0.081) | 0.764 |
|  | *FKBP5*-12 CpG 8 | -0.378 (-0.763~0.008) | 0.055 | -0.0002 (-0.063~0.025) | 0.990 |
|  | *FKBP5*-12 CpG 9 | -0.384 (-0.771~0.004) | 0.052 | 0.003 (-0.032~0.077) | 0.874 |
|  | *FKBP5*-12 CpG 10.11 | -0.379 (-0.765~0.007) | 0.054 | 0.001 (-0.093~0.085) | 0.940 |
|  | *FKBP5*-12 CpG 12 | -0.378 (-0.765~0.009) | 0.055 | -0.002 (-0.055~0.021) | 0.922 |
|  | *FKBP5*-12 CpG 13 | -0.369 (-0.757~0.019) | 0.062 | -0.013 (-0.101~0.015) | 0.598 |
|  | *FKBP5*-12 CpG 14 | -0.368 (-0.754~0.018) | 0.062 | -0.012 (-0.093~0.012) | 0.622 |
|  | *FKBP5*-12 CpG 15 | -0.378 (-0.763~0.008) | 0.055 | -0.001 (-0.045~0.018) | 0.966 |
|  | *FKBP5*-12 CpG 17.18.19 | -0.380 (-0.768~0.008) | 0.055 | 0.002 (-0.045~0.071) | 0.932 |
|  | *FKBP5*-12 CpG 20 | -0.356 (-0.745~0.033) | 0.073 | -0.023 (-0.152~0.017) | 0.465 |

*: Mediation analyses were performed by PROCESS procedure.
